# Supplementary material for: Enhancing photovoltaic performance of DSSCs sensitized with Ru-II complexes by D–π–A configured carbazole based co-sensitizers
Source: Royal Society of Chemistry journal article supplement (doi:10.1039/c8nj00927a), 2018-01-01
Supplement: c8nj00927a1.pdf [file c8nj00927a1.pdf]

## Electronic Supplementary Information

### Enhancing photovoltaic performance of DSSCs sensitized with Ru-II complexes by D- $\pi$ -A configured carbazole based co-sensitizers

Praveen Naik<sup>a</sup>, Mohamed R. Elmorsy<sup>b</sup>, Rui Su<sup>b</sup>, Ahmed El-Shafei<sup>b,\*</sup>, Airody Vasudeva Adhikari<sup>a,\*</sup>

<sup>a</sup>Organic Materials Laboratory, Department of Chemistry, National Institute of Technology Karnataka, Surathkal, Mangalore-575 025, India

(Corresponding Author: A. Vasudeva Adhikari, [avachem@gmail.com](mailto:avachem@gmail.com))

<sup>b</sup>Polymer and Color Chemistry Program, North Carolina State University, Raleigh, NC, 27695, USA

(Corresponding Author: Ahmed El-Shafei, [ahmed\\_el-shafei@ncsu.edu](mailto:ahmed_el-shafei@ncsu.edu))

#### 1. Device fabrication and photovoltaics studies

##### 1.1 Photoelectrochemical Measurements

Photocurrent-voltage characteristics of DSCs were measured using a Keithley 2400 source meter under illumination of AM 1.5 G solar light from solar simulator (SOL3A, Oriel) equipped with a 450 W xenon lamp (91160, Oriel). The incident light intensity was calibrated using a reference Si solar cell (Newport Oriel, 91150V) to set 1 Sun (100 mW/cm<sup>2</sup>). The measurement was fully controlled under Oriel IV Test Station software.

IPCE (incident monochromatic photon to current conversion efficiency) experiments were carried out using a system (QEX10, PV Measurements, USA) equipped with a 75 W short arc xenon lamp (UXL-75XE, USHIO, Japan) as a light source connected to a monochromator. Calibration of incident light was performed before measurements using a silicone photodiode (IF035, PV Measurements). All the measurements were carried out without the use of anti-reflecting film.

##### 1.2 TiO<sub>2</sub> Electrode Preparation and Device Fabrication

Fluorine-doped tin oxide (FTO) coated glasses (2.2 mm thickness, sheet resistance of 8  $\Omega$ /cm<sup>2</sup>, TEC, Pilkington) were washed with detergent, water, acetone and ethanol, sequentially. After this

FTO glass plates were immersed into a 40 mM aqueous  $\text{TiCl}_4$  solution at 70 °C for 30 min and washed with water and ethanol. Thin layer (8-12  $\mu\text{m}$  thick) of  $\text{TiO}_2$  (Solaronix, Ti-Nanoxide D/SP) was deposited (active area, 0.18  $\text{cm}^2$ ) on transparent conducting glass by squeegee printing followed by drying at 350 °C for 10 min and curing at 500 °C for 30 min. Next, after drying the electrodes, scattering layer (5  $\mu\text{m}$  thick)  $\text{TiO}_2$  particles (Solaronix, Ti-Nanoxide R/SP) were printed onto the already deposited  $\text{TiO}_2$  layer. The  $\text{TiO}_2$  electrodes were heated under an air flow at 350 °C for 10 min, followed by heating at 500 °C for 30 min. After cooling to room temperature, the  $\text{TiO}_2$  electrodes were treated with 40 mM aqueous solution of  $\text{TiCl}_4$  at 70 °C for 30 min and then washed with water and ethanol. The electrodes were heated again at 500 °C for 30 min and left to cool to 80 °C before dipping them into the dye solution. The dye solutions (0.3 mM) were prepared in 10 mL 1:1:1 acetonitrile, *tert*-butanol and dimethyl sulfoxide. Chenodeoxycholic acid (CDCA) was added at a concentration of 20 mM. The electrodes were immersed in the dye solutions and then kept at 25 °C for 20 hours to adsorb the dye onto the  $\text{TiO}_2$  surface.

For preparing the counter electrode, pre-cut TCO glasses were washed with water followed by 0.1M HCl in EtOH, and sonication in acetone bath for 10 min. These washed TCO were then dried at 400 °C for 15 min. Thin layer of Pt-paste (Solaronix, Platisol T/SP) on TCO was printed and the printed electrodes were then cured at 450 °C for 10 min. The dye sensitized  $\text{TiO}_2$  electrodes were sandwiched with Pt counter electrodes and the electrolyte (Solaronix, Iodolyte HI-30) was then injected into the cell, while the two electrodes were held together with the clips.

### **3.3 $\text{TiO}_2$ Electrode Preparation and Device Fabrication for Co-sensitized devices**

Fluorine-doped tin oxide (FTO) coated glasses (2.2 mm thickness, sheet resistance of 8  $\Omega/\text{cm}^2$ , TEC, Pilkington) were washed with detergent, water, acetone and ethanol, sequentially. After this FTO glass plates were immersed into a 40 mM aqueous  $\text{TiCl}_4$  solution at 70 °C for 30 min and

washed with water and ethanol. Thin layer (8-12  $\mu\text{m}$  thick) of  $\text{TiO}_2$  (Solaronix, Ti-Nanoxide D/SP) was deposited (active area,  $0.18\text{ cm}^2$ ) on transparent conducting glass by squeegee printing followed by drying at  $350\text{ }^\circ\text{C}$  for 10 min and curing at  $500\text{ }^\circ\text{C}$  for 30 min. Next, after drying the electrodes, scattering layer (5  $\mu\text{m}$  thick)  $\text{TiO}_2$  particles (Solaronix, Ti-Nanoxide R/SP) were printed onto the already deposited  $\text{TiO}_2$  layer. The  $\text{TiO}_2$  electrodes were heated under an air flow at  $350\text{ }^\circ\text{C}$  for 10 min, followed by heating at  $500\text{ }^\circ\text{C}$  for 30 min. After cooling to room temperature, the  $\text{TiO}_2$  electrodes were treated with 40 mM aqueous solution of  $\text{TiCl}_4$  at  $70\text{ }^\circ\text{C}$  for 30 min and then washed with water and ethanol. The electrodes were heated again at  $500\text{ }^\circ\text{C}$  for 30 min and left to cool to  $80\text{ }^\circ\text{C}$  before dipping them into the dye solution. The dye solutions were prepared in 10 mL 1:1:1 acetonitrile, *tert*-butanol and dimethyl sulfoxide, and **NCSU-10/N3** and **P<sub>1-4</sub>** were then dissolved based on the required concentration. Chenodeoxycholic acid (CDCA) was added at a concentration of 10 mM. The electrodes were immersed in the dye solutions and then kept at  $25\text{ }^\circ\text{C}$  for 20 hours to adsorb the dye onto the  $\text{TiO}_2$  surface.

For preparing the counter electrode, pre-cut TCO glasses were washed with water followed by 0.1M HCl in EtOH, and sonication in acetone bath for 10 min. These washed TCO were then dried at  $400\text{ }^\circ\text{C}$  for 15 min. Thin layer of Pt-paste (Solaronix, Platisol T/SP) on TCO was printed and the printed electrodes were then cured at  $450\text{ }^\circ\text{C}$  for 10 min. The dye sensitized  $\text{TiO}_2$  electrodes were sandwiched with Pt counter electrodes and the electrolyte (Solaronix, Iodolyte HI-30) was then injected into the cell, while the two electrodes were held together with the clips.

## **2. Photos of the devices:**

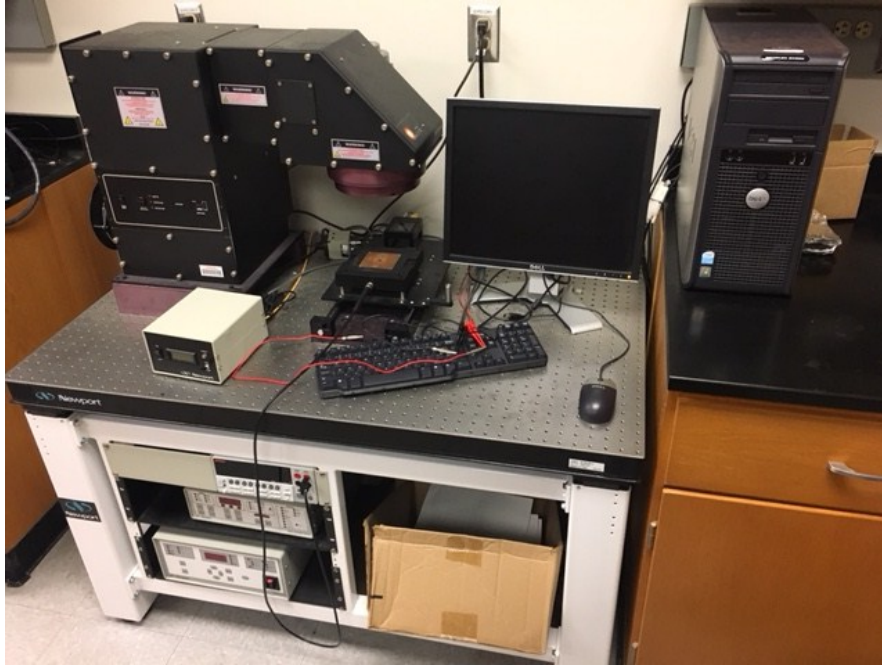

**Fig S<sub>1</sub>:** Solar Simulator (Oriel Sol3A Class AAA) for photovoltaic measurements

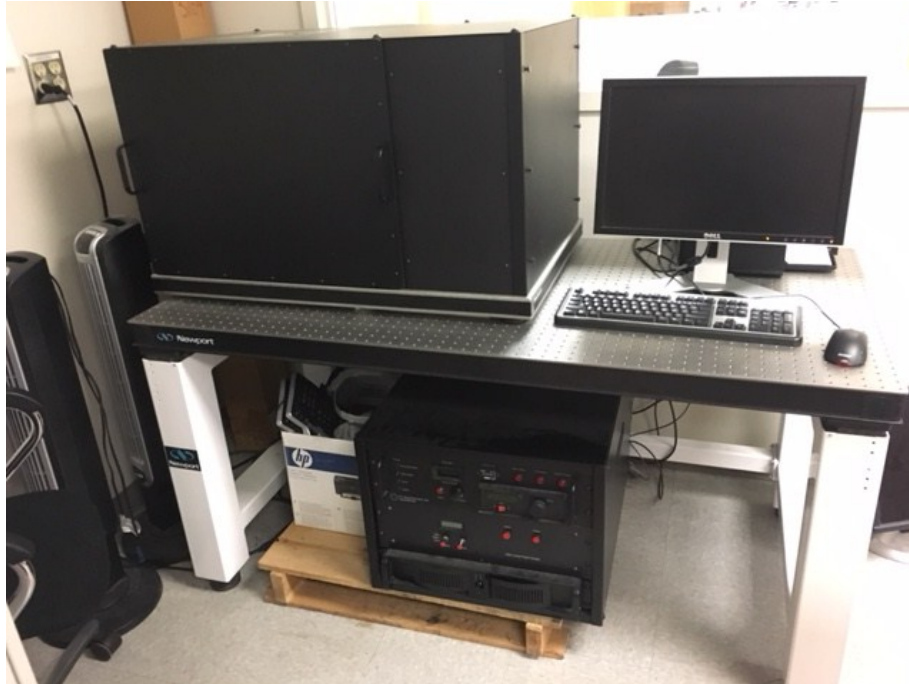

**Fig S<sub>2</sub>:** CEP-2000 system (Bunkoh-Keiki Co. Ltd.) for IPCE measurements

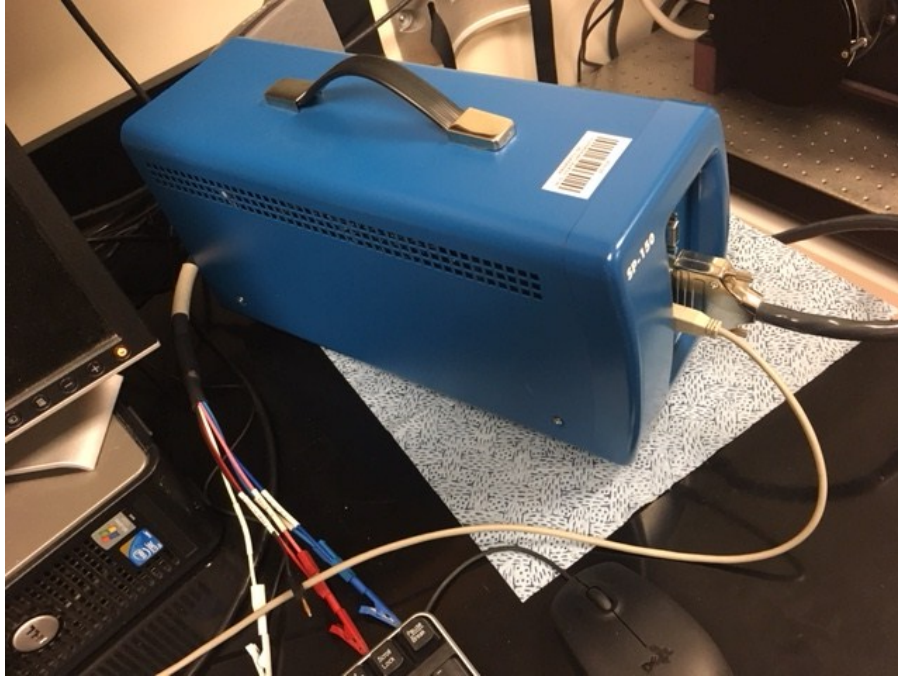

**Fig S<sub>3</sub>:** Impedance analyzer potentiostat (Bio-Logic SP-150)
